# Supplementary material
Source: PubMed Central journal article supplement (PMC2795643)

## SUPPLEMENTAL MATERIAL

### Supplemental Methods:

#### *Covariates*

Smoking and alcohol use were categorized into current versus never/former. Education was categorized as  $\geq$  college education versus  $<$  college education and income was represented as  $\geq$  \$40,000 versus  $<$ \$40,000. Height was measured by a stadiometer to the nearest 0.1 of a centimeter. Weight was measured to the nearest pound using a platform balance scale. Body mass index (BMI) was calculated as weight in kilograms per height in meters squared. Waist circumference was measured using a Gulick II anthropometric tape and was rounded to the nearest centimeter. Medication use was obtained via medication inventory. Estimated glomerular filtration rate (eGFR) was calculated using the equation  $186 * \text{creatinine}^{-1.154} * \text{age}^{-0.203} * 0.742(\text{if female}) * 1.21(\text{if African-American})$ , and prevalent chronic kidney disease was defined as an  $\text{eGFR} \leq 60 \text{ ml/min/1.73m}^2$ . Prevalent diabetes was defined as fasting glucose  $\geq 126 \text{ mg/dL}$ , use of insulin/oral diabetes medications, or a self-report of physician diagnosed diabetes. Prevalent hypertension was defined based on self-report of physician-diagnosed hypertension, diastolic blood pressure  $\geq 90 \text{ mmHg}$ , systolic blood pressure  $\geq 140 \text{ mmHg}$ , or use of anti-hypertensive medications. Systolic and diastolic blood pressures were determined by averaging the last two of three measurements taken with the Dinamap automated blood pressure device (GE Healthcare). Plasma HDL-cholesterol, plasma triglycerides, fasting plasma glucose, and C-reactive protein were measured at a central laboratory after a 12 hour fast. LDL-cholesterol was calculated using the Friedewald formula.

#### *Ancestry Estimation*

An admixture model with prior population information was employed in STRUCTURE with 50,000 burn-ins and 50,000 replications and assuming independent allele frequencies. AIMs on the X chromosome were not removed; however, testing interactions of gender and ancestry was not of interest for this research. Ancestry among Hispanics was estimated using information on the 103 AIMs informative for Hispanic ancestry only, and then all 199 AIMs. For African Americans, ancestry was estimated with 96 AIMs informative for differences in European and African ancestry, and also using all 199 AIMs. Spearman correlations were used to assess how well ancestry estimates agreed using all AIMs versus subsets of the AIMs.

Ancestry estimates for the Hispanic group using the 103 markers informative for Hispanic ancestry and using all 199 markers correlated well,  $r=0.88$  for African ancestry and  $0.98$  for both the European and Native American estimates. Thus, the final ancestry estimates among the Hispanics were based on the set of 199 markers for completeness. Correlations for ancestry estimates among Hispanics using all 199 markers were  $-0.14$  for African and European ancestry,  $-0.48$  for African and Native American ancestry, and  $-0.64$  for European and Native American ancestry, indicating no multicollinearity risk; European and Native American ancestry were thus used to describe the Hispanic group.

For African Americans, ancestry estimates obtained using all 199 markers and 3 ancestral populations showed  $<1\%$  Native American ancestry. Correlations between European ancestry estimates using all 199 markers with 3 ancestral populations versus using 96 markers with 2 ancestral populations were  $0.95$  for the African Americans. Furthermore, among the African Americans, the correlation for European ancestry using all 199 markers with two ancestral populations versus the 96-marker panel with two ancestral populations was  $0.95$ . Based on the

log likelihood and correlation results, final ancestry estimates for the African-Americans were based on the 96-marker panel with two ancestral populations.

**Supplemental Table 1. Ancestry informative markers and minor allele frequencies among four ethnic groups from MESA**

| Marker<br>rs number | Chromosome | Position  | MESA<br>Panel* | Caucasian<br>MA (MAF)† | African-<br>American<br>MA (MAF)† | Hispanic<br>MA (MAF)† | Chinese<br>MA (MAF)† |
|---------------------|------------|-----------|----------------|------------------------|-----------------------------------|-----------------------|----------------------|
| rs884080            | 1          | 2016609   | 1              | G (0.482)              | A (0.246)                         | A (0.362)             | A (0.0404)           |
| rs424436            | 1          | 8005265   | 2              | G (0.00351)            | G (0.0485)                        | <b>G (0.24)</b>       | A (0.399)            |
| rs7528979           | 1          | 10016044  | 1              | A (0.169)              | G (0.272)                         | <b>A (0.227)</b>      | A (0.366)            |
| rs2273348           | 1          | 11001664  | 1              | A (0.209)              | G (0.284)                         | <b>A (0.296)</b>      | A (0.35)             |
| rs4846012           | 1          | 11480513  | 1              | A (0.376)              | C (0.160)                         | A (0.472)             | C (0.29)             |
| rs7504              | 1          | 27110737  | 2              | A (0.214)              | A (0.351)                         | G (0.494)             | G (0.0659)           |
| rs204057            | 1          | 29144644  | 1              | A (0.224)              | A (0.385)                         | A (0.414)             | C (0.156)            |
| rs1931059           | 1          | 35138643  | 2              | A (0.195)              | A (0.083)                         | A (0.369)             | G (0.0778)           |
| rs2016160           | 1          | 47344188  | 1              | A (0.34)               | A (0.485)                         | A (0.43)              | G (0.0404)           |
| rs911903            | 1          | 47385259  | 1              | G (0.332)              | G (0.474)                         | G (0.436)             | A (0.0244)           |
| rs1242330           | 1          | 53169430  | 1              | A (0.455)              | C (0.210)                         | C (0.344)             | C (0.0216)           |
| rs596985            | 1          | 64049623  | 2              | G (0.0253)             | A (0.374)                         | <b>G (0.135)</b>      | G (0.171)            |
| rs1739897           | 1          | 75888650  | 1              | T (0.406)              | A (0.414)                         | T (0.491)             | A (0.0467)           |
| rs1536570           | 1          | 81478165  | 1              | G (0.499)              | G (0.303)                         | G (0.409)             | G (0.0334)           |
| rs5025718           | 1          | 120279808 | 2              | A (0.129)              | G (0.219)                         | <b>A (0.269)</b>      | A (0.107)            |
| rs2274533           | 1          | 149662406 | 2              | A (0.173)              | A (0.402)                         | <b>A (0.46)</b>       | G (0.215)            |
| rs2065160           | 1          | 203057600 | 2              | G (0.0808)             | G (0.388)                         | <b>G (0.425)</b>      | A (0.237)            |
| rs723632            | 1          | 212126375 | 2              | C (0.0695)             | G (0.271)                         | <b>C (0.268)</b>      | C (0.245)            |
| rs2290753           | 1          | 241873061 | 1              | G (0.307)              | A (0.192)                         | G (0.481)             | A (0.49)             |
| rs6426327           | 1          | 244156434 | 1              | G (0.121)              | <b>A (0.318)</b>                  | G (0.293)             | A (0.456)            |
| rs2642995           | 1          | 245239188 | 1              | G (0.332)              | A (0.346)                         | G (0.318)             | G (0.0125)           |
| rs2001660           | 2          | 9530892   | 1              | A (0.379)              | A (0.271)                         | <b>G (0.409)</b>      | G (0.0585)           |
| rs883399            | 2          | 9551551   | 2              | G (0.382)              | A (0.472)                         | <b>A (0.368)</b>      | A (0.096)            |
| rs1510834           | 2          | 13661642  | 1              | G (0.275)              | A (0.200)                         | A (0.475)             | <b>A (0.309)</b>     |
| rs300152            | 2          | 17850164  | 2              | A (0.197)              | A (0.250)                         | <b>A (0.479)</b>      | C (0.0365)           |
| rs2384319           | 2          | 26059759  | 2              | C (0.0914)             | C (0.0856)                        | C (0.373)             | A (0.0865)           |
| rs3287              | 2          | 54661161  | 2              | G (0.239)              | A (0.377)                         | G (0.294)             | G (0.124)            |
| rs3768641           | 2          | 72221698  | 2              | C (0.0948)             | G (0.225)                         | <b>C (0.224)</b>      | C (0.0429)           |
| rs975612            | 2          | 72242842  | 1              | C (0.363)              | A (0.192)                         | <b>C (0.404)</b>      | C (0.0369)           |
| rs1019837           | 2          | 83268591  | 1              | G (0.44)               | G (0.106)                         | G (0.333)             | A (0.287)            |
| rs1796048           | 2          | 97007303  | 1              | A (0.279)              | G (0.204)                         | G (0.446)             | G (0.316)            |
| rs260714            | 2          | 108928927 | 2              | A (0.14)               | G (0.343)                         | A (0.473)             | G (0.0421)           |
| rs2305260           | 2          | 128795787 | 2              | G (0.271)              | G (0.179)                         | G (0.448)             | A (0.221)            |
| rs901304            | 2          | 163124608 | 2              | G (0.207)              | A (0.275)                         | G (0.459)             | A (0.47)             |
| rs1521527           | 2          | 165136071 | 1              | G (0.489)              | C (0.259)                         | C (0.359)             | C (0.0104)           |
| rs1374197           | 3          | 17369619  | 1              | G (0.477)              | A (0.309)                         | <b>G (0.384)</b>      | G (0.0592)           |
| rs1013758           | 3          | 43601379  | 1              | G (0.444)              | A (0.164)                         | A (0.387)             | G (0.257)            |
| rs9847748           | 3          | 69028378  | 2              | G (0.336)              | A (0.425)                         | A (0.418)             | A (0.207)            |
| rs1996818           | 3          | 70395474  | 1              | A (0.499)              | G (0.377)                         | G (0.418)             | G (0.0195)           |
| rs13069719          | 3          | 71589235  | 2              | A (0.2)                | A (0.276)                         | A (0.401)             | G (0.0754)           |
| rs1441443           | 3          | 74005900  | 1              | C (0.23)               | C (0.414)                         | C (0.401)             | A (0.253)            |

|            |   |           |   |                  |            |                  |                  |
|------------|---|-----------|---|------------------|------------|------------------|------------------|
| rs1352158  | 3 | 98805761  | 2 | A (0.129)        | T (0.352)  | A (0.462)        | T (0.482)        |
| rs6437783  | 3 | 109655507 | 2 | G (0.18)         | G (0.281)  | <b>G (0.393)</b> | A (0.0183)       |
| rs1039524  | 3 | 115494964 | 1 | G (0.416)        | A (0.232)  | <b>G (0.391)</b> | G (0.0947)       |
| rs1147696  | 3 | 121602169 | 1 | G (0.473)        | G (0.352)  | G (0.463)        | G (0.0341)       |
| rs531577   | 3 | 139883989 | 1 | <b>A (0.452)</b> | C (0.277)  | <b>A (0.348)</b> | A (0.00837)      |
| rs584059   | 3 | 140313776 | 2 | C (0.0871)       | C (0.425)  | C (0.304)        | C (0.343)        |
| rs2165139  | 3 | 140697160 | 2 | A (0.0955)       | A (0.0464) | <b>A (0.366)</b> | T (0.15)         |
| rs9290363  | 3 | 170477801 | 2 | C (0.0618)       | A (0.302)  | <b>C (0.208)</b> | C (0.371)        |
| rs717239   | 4 | 77394767  | 1 | A (0.494)        | G (0.282)  | G (0.322)        | G (0.016)        |
| rs965935   | 4 | 110001237 | 1 | A (0.426)        | C (0.276)  | A (0.408)        | A (0.0641)       |
| rs1017507  | 4 | 135362438 | 1 | A (0.492)        | C (0.192)  | <b>C (0.31)</b>  | C (0.0132)       |
| rs1824347  | 4 | 174001152 | 1 | G (0.456)        | A (0.186)  | <b>G (0.419)</b> | G (0.0752)       |
| rs11723316 | 4 | 184652332 | 2 | A (0.4)          | C (0.250)  | C (0.317)        | C (0.136)        |
| rs814597   | 5 | 10521929  | 2 | A (0.116)        | A (0.20)   | A (0.359)        | G (0.336)        |
| rs35395    | 5 | 33984346  | 2 | A (0.0414)       | G (0.345)  | <b>A (0.497)</b> | G (0.123)        |
| rs930072   | 5 | 36701828  | 2 | G (0.13)         | A (0.20)   | <b>G (0.345)</b> | A (0.372)        |
| rs3309     | 5 | 56128536  | 2 | A (0.279)        | A (0.417)  | A (0.478)        | T (0.211)        |
| rs173686   | 5 | 82847256  | 1 | G (0.431)        | A (0.253)  | A (0.432)        | A (0.132)        |
| rs3317     | 5 | 112240050 | 2 | G (0.444)        | A (0.153)  | <b>G (0.479)</b> | <b>G (0.341)</b> |
| rs1021516  | 5 | 116572071 | 1 | A (0.442)        | C (0.193)  | <b>A (0.448)</b> | A (0.108)        |
| rs877826   | 5 | 138646696 | 1 | A (0.327)        | C (0.180)  | A (0.46)         | C (0.16)         |
| rs1551765  | 5 | 153156771 | 2 | <b>A (0.181)</b> | A (0.283)  | A (0.405)        | G (0.0929)       |
| rs3340     | 5 | 153812060 | 2 | G (0.204)        | G (0.106)  | <b>G (0.393)</b> | G (0.256)        |
| rs262838   | 5 | 169107272 | 2 | G (0.169)        | A (0.388)  | G (0.455)        | G (0.283)        |
| rs185493   | 5 | 177923864 | 1 | A (0.409)        | G (0.143)  | G (0.366)        | G (0.249)        |
| rs1953088  | 6 | 13033922  | 1 | C (0.385)        | A (0.244)  | C (0.475)        | C (0.071)        |
| rs9356944  | 6 | 24825394  | 2 | G (0.00983)      | G (0.0752) | G (0.216)        | G (0.475)        |
| rs3734693  | 6 | 44073143  | 1 | G (0.197)        | A (0.315)  | <b>G (0.309)</b> | G (0.416)        |
| rs1928533  | 6 | 45617802  | 1 | G (0.422)        | A (0.350)  | G (0.428)        | G (0.0481)       |
| rs1266874  | 6 | 51887597  | 2 | G (0.336)        | A (0.376)  | A (0.406)        | <b>A (0.1)</b>   |
| rs1016461  | 6 | 69092970  | 1 | G (0.492)        | G (0.246)  | A (0.396)        | A (0.183)        |
| rs218867   | 6 | 121440234 | 2 | G (0.147)        | A (0.255)  | <b>G (0.498)</b> | G (0.344)        |
| rs1538956  | 6 | 127005719 | 1 | C (0.487)        | A (0.221)  | <b>C (0.37)</b>  | C (0.0251)       |
| rs1022573  | 6 | 127096607 | 1 | A (0.478)        | C (0.220)  | <b>A (0.363)</b> | A (0.0237)       |
| rs200148   | 6 | 143387389 | 1 | G (0.428)        | A (0.455)  | A (0.373)        | A (0.0369)       |
| rs1744173  | 6 | 158425076 | 2 | A (0.142)        | A (0.0478) | <b>A (0.376)</b> | A (0.378)        |
| rs901369   | 6 | 159129200 | 2 | G (0.23)         | G (0.0956) | G (0.45)         | A (0.187)        |
| rs727619   | 6 | 170548119 | 1 | <b>C (0.369)</b> | A (0.409)  | C (0.451)        | A (0.0313)       |
| rs880020   | 7 | 13653252  | 2 | C (0.28)         | C (0.261)  | C (0.222)        | C (0.214)        |
| rs1880550  | 7 | 14741017  | 2 | A (0.186)        | C (0.324)  | A (0.443)        | A (0.428)        |
| rs1985080  | 7 | 33593384  | 2 | A (0.245)        | G (0.235)  | <b>A (0.271)</b> | A (0.465)        |
| rs722263   | 7 | 92724748  | 1 | G (0.39)         | A (0.136)  | A (0.425)        | A (0.38)         |
| rs201492   | 7 | 101540858 | 1 | G (0.382)        | G (0.229)  | G (0.488)        | A (0.0801)       |
| rs6601288  | 8 | 8980840   | 2 | A (0.292)        | A (0.200)  | <b>A (0.487)</b> | T (0.0706)       |
| rs11778591 | 8 | 12764720  | 2 | C (0.103)        | A (0.484)  | C (0.463)        | A (0.116)        |
| rs718251   | 8 | 52877076  | 1 | C (0.339)        | A (0.164)  | <b>C (0.435)</b> | A (0.483)        |

|           |    |           |   |                  |                  |                  |                  |
|-----------|----|-----------|---|------------------|------------------|------------------|------------------|
| rs997898  | 8  | 91968681  | 1 | A (0.353)        | <b>G (0.153)</b> | G (0.381)        | G (0.192)        |
| rs913258  | 8  | 97602942  | 2 | G (0.149)        | C (0.284)        | G (0.335)        | C (0.245)        |
| rs1888952 | 9  | 16248118  | 1 | A (0.45)         | G (0.216)        | <b>A (0.399)</b> | A (0.0481)       |
| rs4478653 | 9  | 21843221  | 2 | <b>G (0.417)</b> | A (0.300)        | A (0.369)        | A (0.21)         |
| rs2695    | 9  | 82074397  | 2 | A (0.279)        | A (0.269)        | <b>A (0.478)</b> | A (0.462)        |
| rs2026999 | 9  | 102179978 | 1 | G (0.334)        | A (0.445)        | <b>A (0.419)</b> | A (0.104)        |
| rs1417999 | 9  | 103150498 | 2 | A (0.398)        | G (0.219)        | G (0.371)        | G (0.225)        |
| rs587364  | 9  | 124800684 | 2 | A (0.147)        | <b>G (0.198)</b> | A (0.437)        | G (0.319)        |
| rs7860423 | 9  | 140075368 | 1 | A (0.187)        | G (0.268)        | <b>A (0.228)</b> | G (0.34)         |
| rs713588  | 10 | 5926968   | 1 | G (0.42)         | A (0.284)        | G (0.374)        | G (0.126)        |
| rs359280  | 10 | 17359713  | 1 | G (0.478)        | A (0.442)        | <b>A (0.358)</b> | A (0.121)        |
| rs1951936 | 10 | 28433602  | 2 | T (0.166)        | A (0.472)        | T (0.478)        | A (0.0452)       |
| rs7349    | 10 | 31857911  | 2 | A (0.0618)       | G (0.241)        | <b>A (0.195)</b> | <b>A (0.207)</b> |
| rs1268722 | 10 | 50621216  | 1 | A (0.43)         | A (0.133)        | A (0.434)        | G (0.127)        |
| rs994174  | 10 | 84448571  | 2 | <b>G (0.343)</b> | A (0.330)        | G (0.384)        | G (0.348)        |
| rs1050755 | 10 | 112043589 | 1 | G (0.414)        | A (0.178)        | G (0.435)        | G (0.139)        |
| rs1572396 | 10 | 117315011 | 2 | A (0.294)        | G (0.420)        | G (0.462)        | G (0.191)        |
| rs6485600 | 11 | 12216278  | 2 | A (0.322)        | G (0.401)        | G (0.448)        | G (0.081)        |
| rs594689  | 11 | 65392135  | 2 | G (0.477)        | A (0.195)        | A (0.315)        | A (0.199)        |
| rs1638567 | 11 | 66881799  | 2 | G (0.0688)       | A (0.346)        | <b>G (0.376)</b> | G (0.261)        |
| rs2458640 | 11 | 77713504  | 2 | C (0.235)        | A (0.224)        | C (0.458)        | A (0.241)        |
| rs1042602 | 11 | 88551344  | 2 | A (0.386)        | A (0.0767)       | A (0.251)        | ? (0)            |
| rs533571  | 11 | 100355412 | 2 | A (0.289)        | A (0.169)        | <b>A (0.496)</b> | G (0.0476)       |
| rs326946  | 11 | 110004463 | 2 | C (0.131)        | C (0.498)        | C (0.177)        | C (0.138)        |
| rs1800498 | 11 | 112796798 | 2 | G (0.39)         | <b>A (0.237)</b> | A (0.371)        | A (0.0587)       |
| rs4936512 | 11 | 119660546 | 2 | G (0.209)        | G (0.319)        | G (0.468)        | A (0.128)        |
| rs1648180 | 11 | 127554612 | 2 | A (0.253)        | A (0.414)        | G (0.46)         | G (0.0317)       |
| rs984303  | 12 | 15641658  | 2 | G (0.0147)       | A (0.403)        | <b>G (0.11)</b>  | G (0.0325)       |
| rs1433251 | 12 | 71362298  | 1 | G (0.286)        | <b>A (0.192)</b> | G (0.44)         | A (0.282)        |
| rs1396226 | 12 | 73586112  | 1 | G (0.364)        | A (0.158)        | A (0.494)        | A (0.26)         |
| rs1163016 | 12 | 79576484  | 1 | G (0.377)        | A (0.211)        | G (0.397)        | G (0.47)         |
| rs903770  | 12 | 115776340 | 1 | G (0.263)        | <b>A (0.206)</b> | <b>G (0.295)</b> | A (0.454)        |
| rs2293048 | 12 | 116149208 | 2 | A (0.0985)       | A (0.449)        | <b>A (0.388)</b> | A (0.103)        |
| rs7995033 | 13 | 24729888  | 2 | A (0.171)        | G (0.260)        | <b>A (0.491)</b> | A (0.422)        |
| rs2065982 | 13 | 33762240  | 2 | G (0.0758)       | G (0.0872)       | <b>G (0.347)</b> | A (0.305)        |
| rs188481  | 13 | 62710392  | 1 | A (0.451)        | A (0.257)        | A (0.321)        | A (0.0237)       |
| rs767778  | 13 | 79095116  | 1 | A (0.386)        | T (0.147)        | T (0.367)        | T (0.316)        |
| rs898271  | 13 | 90539922  | 1 | A (0.489)        | G (0.293)        | G (0.36)         | G (0.0167)       |
| rs1408209 | 13 | 92805575  | 1 | A (0.329)        | G (0.475)        | A (0.498)        | G (0.0864)       |
| rs1540979 | 13 | 93888693  | 2 | A (0.129)        | A (0.0599)       | A (0.344)        | T (0.271)        |
| rs719185  | 13 | 107079922 | 1 | G (0.34)         | A (0.323)        | <b>G (0.301)</b> | G (0.00209)      |
| rs8003430 | 14 | 23939674  | 2 | A (0.1)          | A (0.120)        | A (0.333)        | G (0.294)        |
| rs179562  | 14 | 30294209  | 1 | G (0.253)        | A (0.317)        | G (0.446)        | G (0.38)         |
| rs1947393 | 14 | 49052346  | 1 | G (0.442)        | <b>A (0.116)</b> | <b>A (0.312)</b> | G (0.242)        |
| rs981270  | 14 | 85249374  | 1 | A (0.364)        | G (0.324)        | A (0.402)        | A (0.0738)       |
| rs736394  | 14 | 93425377  | 2 | A (0.18)         | A (0.332)        | A (0.201)        | A (0.00476)      |

|            |    |           |   |             |                  |                  |                   |
|------------|----|-----------|---|-------------|------------------|------------------|-------------------|
| rs730570   | 14 | 100212643 | 2 | G (0.125)   | <b>A (0.365)</b> | <b>A (0.484)</b> | A (0.245)         |
| rs2714758  | 15 | 23030430  | 2 | G (0.0463)  | A (0.285)        | <b>G (0.152)</b> | G (0.0222)        |
| rs1800404  | 15 | 25909368  | 2 | G (0.224)   | A (0.226)        | G (0.47)         | A (0.395)         |
| rs1129038  | 15 | 26030454  | 2 | G (0.256)   | A (0.165)        | A (0.208)        | A (0.00159)       |
| rs2862     | 15 | 32932845  | 2 | G (0.232)   | G (0.345)        | G (0.406)        | G (0.454)         |
| rs1108081  | 15 | 35893455  | 1 | G (0.456)   | A (0.182)        | G (0.465)        | G (0.13)          |
| rs573615   | 15 | 41401573  | 1 | A (0.334)   | G (0.158)        | <b>A (0.387)</b> | A (0.493)         |
| rs1648282  | 15 | 43213156  | 1 | G (0.445)   | A (0.161)        | A (0.427)        | A (0.328)         |
| rs1648312  | 15 | 43244641  | 1 | G (0.46)    | A (0.260)        | A (0.309)        | A (0.0508)        |
| rs4646     | 15 | 49290136  | 2 | A (0.25)    | A (0.327)        | A (0.429)        | A (0.312)         |
| rs387812   | 15 | 56862078  | 1 | G (0.42)    | A (0.224)        | A (0.372)        | A (0.0585)        |
| rs11457    | 15 | 61673432  | 1 | G (0.478)   | C (0.433)        | C (0.465)        | C (0.0578)        |
| rs1266490  | 15 | 89258224  | 1 | C (0.444)   | G (0.294)        | G (0.317)        | G (0.00628)       |
| rs11073967 | 15 | 89366808  | 2 | G (0.382)   | A (0.158)        | A (0.327)        | A (0.00714)       |
| rs9937955  | 16 | 10858027  | 2 | A (0.194)   | A (0.469)        | T (0.497)        | T (0.152)         |
| rs1557519  | 16 | 14158804  | 2 | G (0.0808)  | A (0.256)        | <b>G (0.251)</b> | G (0.297)         |
| rs223830   | 16 | 56009472  | 2 | G (0.216)   | G (0.0879)       | <b>G (0.318)</b> | G (0.408)         |
| rs2967305  | 16 | 80877154  | 1 | C (0.266)   | A (0.218)        | C (0.452)        | C (0.451)         |
| rs2228478  | 16 | 88514109  | 2 | G (0.0928)  | G (0.435)        | G (0.122)        | G (0.317)         |
| rs2891     | 17 | 3652275   | 2 | A (0.487)   | G (0.135)        | G (0.411)        | A (0.324)         |
| rs2816     | 17 | 7864289   | 2 | A (0.485)   | A (0.115)        | A (0.29)         | A (0.05)          |
| rs6503211  | 17 | 9333425   | 1 | A (0.209)   | G (0.430)        | <b>A (0.489)</b> | <b>G (0.153)</b>  |
| rs6587216  | 17 | 19164990  | 2 | G (0.193)   | G (0.256)        | G (0.423)        | C (0.0254)        |
| rs203096   | 17 | 47366768  | 2 | A (0.289)   | A (0.349)        | A (0.416)        | C (0.498)         |
| rs7211306  | 17 | 77960642  | 2 | A (0.305)   | A (0.314)        | G (0.474)        | G (0.106)         |
| rs11664524 | 18 | 7222892   | 1 | G (0.177)   | <b>A (0.251)</b> | <b>G (0.394)</b> | A (0.353)         |
| rs2077863  | 18 | 11046815  | 2 | C (0.0281)  | C (0.316)        | <b>C (0.122)</b> | C (0.0508)        |
| rs2164062  | 18 | 17233261  | 1 | C (0.171)   | G (0.293)        | C (0.491)        | C (0.422)         |
| rs953786   | 18 | 19859785  | 2 | C (0.209)   | G (0.203)        | <b>G (0.445)</b> | G (0.308)         |
| rs1020382  | 19 | 218039    | 1 | G (0.408)   | G (0.165)        | G (0.435)        | A (0.114)         |
| rs17638989 | 19 | 12521394  | 2 | A (0.414)   | G (0.339)        | G (0.341)        | G (0.0508)        |
| rs4884     | 19 | 50501875  | 2 | A (0.291)   | A (0.187)        | <b>G (0.477)</b> | G (0.236)         |
| rs1418032  | 20 | 2025744   | 2 | G (0.291)   | C (0.216)        | <b>C (0.384)</b> | C (0.0706)        |
| rs6047134  | 20 | 2089054   | 1 | A (0.288)   | G (0.456)        | G (0.419)        | G (0.062)         |
| rs6086473  | 20 | 8432107   | 2 | A (0.307)   | A (0.303)        | A (0.3)          | A (0.317)         |
| rs293553   | 20 | 30549021  | 2 | G (0.393)   | A (0.322)        | A (0.378)        | A (0.00873)       |
| rs722098   | 21 | 15607469  | 2 | G (0.188)   | A (0.275)        | G (0.482)        | A (0.446)         |
| rs1689045  | 21 | 16525943  | 2 | A (0.00632) | <b>G (0.369)</b> | <b>A (0.122)</b> | A (0.000794)      |
| rs235936   | 21 | 27538396  | 2 | G (0.471)   | <b>G (0.255)</b> | G (0.404)        | G (0.183)         |
| rs2837956  | 21 | 41401386  | 1 | A (0.358)   | G (0.22)         | A (0.325)        | <b>A (0.0912)</b> |
| rs1475930  | 22 | 21580737  | 2 | G (0.231)   | G (0.463)        | G (0.484)        | A (0.113)         |
| rs3747295  | X  | 17656165  | 2 | G (0.0295)  | A (0.2)          | G (0.376)        | G (0.433)         |
| rs936423   | X  | 19503658  | 1 | G (0.181)   | A (0.387)        | G (0.257)        | G (0.0139)        |
| rs1978240  | X  | 23725536  | 2 | A (0.298)   | C (0.139)        | A (0.486)        | C (0.31)          |
| rs1884688  | X  | 37389059  | 1 | G (0.271)   | C (0.143)        | G (0.325)        | G (0.079)         |
| rs4076107  | X  | 39824944  | 1 | A (0.105)   | G (0.215)        | A (0.221)        | A (0.481)         |

|           |   |           |   |            |           |           |              |
|-----------|---|-----------|---|------------|-----------|-----------|--------------|
| rs953114  | X | 41082486  | 1 | C (0.417)  | A (0.297) | A (0.351) | A (0.0453)   |
| rs734329  | X | 42498295  | 2 | C (0.143)  | A (0.376) | C (0.478) | A (0.265)    |
| rs760866  | X | 65330706  | 1 | T (0.24)   | A (0.245) | T (0.318) | T (0.000696) |
| rs1011526 | X | 65332812  | 1 | A (0.241)  | G (0.162) | A (0.329) | A (0.000696) |
| rs1277959 | X | 68117310  | 2 | A (0.487)  | G (0.281) | G (0.354) | G (0.402)    |
| rs5981813 | X | 74355723  | 2 | G (0.0983) | A (0.221) | G (0.412) | A (0.0611)   |
| rs1935074 | X | 80063759  | 1 | G (0.421)  | A (0.497) | G (0.5)   | A (0.0418)   |
| rs525869  | X | 90482815  | 1 | G (0.45)   | A (0.157) | G (0.343) | G (0.12)     |
| rs1152324 | X | 106180145 | 1 | A (0.207)  | C (0.259) | C (0.479) | C (0.421)    |
| rs980099  | X | 106198643 | 1 | G (0.209)  | A (0.262) | G (0.411) | A (0.49)     |
| rs992864  | X | 110387239 | 2 | A (0.0435) | G (0.222) | A (0.185) | A (0.000794) |
| rs1558022 | X | 116392347 | 1 | G (0.456)  | G (0.197) | G (0.239) | G (0.00209)  |
| rs1716758 | X | 117343936 | 1 | A (0.236)  | G (0.165) | G (0.374) | G (0.443)    |
| rs2380316 | X | 117418426 | 2 | A (0.238)  | G (0.166) | G (0.376) | G (0.439)    |
| rs1883906 | X | 126516925 | 1 | G (0.324)  | A (0.14)  | A (0.406) | G (0.0501)   |
| rs2200290 | X | 126815148 | 1 | A (0.259)  | G (0.293) | G (0.468) | A (0.0738)   |
| rs1867024 | X | 147788104 | 2 | G (0.0527) | A (0.297) | G (0.161) | G (0.0381)   |
| rs758439  | X | 147872587 | 1 | G (0.279)  | A (0.188) | G (0.333) | G (0.12)     |
| rs1882719 | X | 150352161 | 1 | G (0.442)  | A (0.284) | A (0.248) | A (0.0188)   |
| rs762656  | X | 152864846 | 2 | G (0.192)  | A (0.331) | A (0.442) | A (0.25)     |

\*MESA Panel 1 AIMs were informative for differences between Caucasians and African Americans, Caucasians and Chinese, or African American and Chinese; Panel 2 AIMs were informative for Hispanic ancestry

†MA=minor allele/MAF=minor allele frequency; bolded MA and MAF represent non-X chromosome markers out of Hardy-Weinberg Equilibrium



**Supplemental Table 2. Log-likelihoods for determining the number of ancestral population groups (K)\***

|            | <b>African-Americans</b> | <b>Hispanics</b> |
|------------|--------------------------|------------------|
| <b>K=1</b> | -191196.1                | -377055.8        |
| <b>K=2</b> | -167219.9                | -356485.0        |
| <b>K=3</b> | -162666.0                | -347277.8        |
| <b>K=4</b> | -162501.1                | -341741.5        |
| <b>K=5</b> | -162164.4                | -338779.8        |

\*In determining the appropriate number of population groups (K) for both the African American and Hispanic groups, K was varied between 1 and 5 with multiple iterations per K.

**Supplemental Table 3. Percent (95% CI) and common and internal cIMT outcomes among Hispanics**

|                     | <b>Common cIMT<br/>Percent (95% CI)<br/>n=697</b> | <b>p</b> | <b>Internal cIMT<br/>Percent (95% CI)<br/>n=683</b> | <b>p</b> |
|---------------------|---------------------------------------------------|----------|-----------------------------------------------------|----------|
| Unadjusted          |                                                   |          |                                                     |          |
| European            | 0.6 (-1.4, 2.7)                                   | 0.54     | 9.0 (4.2, 14.0)                                     | <0.001   |
| Native American     | -0.4 (-2.4, 1.6)                                  | 0.71     | 3.6 (-1.0, 8.3)                                     | 0.13     |
| Demographics†       |                                                   |          |                                                     |          |
| European            | -2.0 (-4.0, -0.1)                                 | 0.04     | 2.2 (-2.5, 7.1)                                     | 0.37     |
| Native American     | -2.0 (-4.3, 0.4)                                  | 0.10     | -2.1 (-7.4, 3.6)                                    | 0.47     |
| Lifestyle/Comorbid‡ |                                                   |          |                                                     |          |
| European            | -1.7 (-3.6, 0.3)                                  | 0.10     | 2.7 (-2.0, 7.7)                                     | 0.26     |
| Native American     | -1.6 (-3.9, 0.7)                                  | 0.17     | -1.6 (-7.0, 4.1)                                    | 0.57     |
| Lipids, glucose§    |                                                   |          |                                                     |          |
| European            | -1.7 (-3.7, 0.2)                                  | 0.09     | 2.1 (-2.6, 7.1)                                     | 0.39     |
| Native American     | -1.5 (-3.8, 0.9)                                  | 0.22     | -1.1 (-6.6, 4.7)                                    | 0.71     |

\*Standard deviation for European ancestry is 21.9% and for Native American ancestry is 23.7%

†Includes age, site, gender, education, and income

‡Additional adjustment for BMI, waist circumference, current smoking, current alcohol use, prevalent diabetes, chronic kidney disease, and hypertension

§Additional adjustment for fasting plasma glucose, triglycerides, LDL cholesterol, HDL cholesterol, and CRP

**Supplemental Figure 1. Distributions of European and African ancestry among African-Americans**

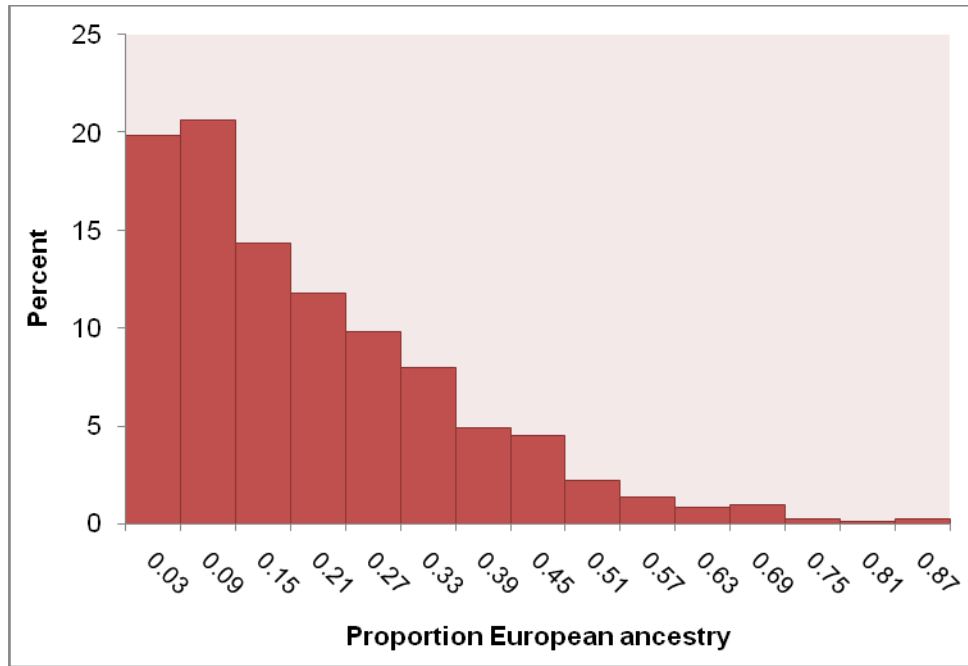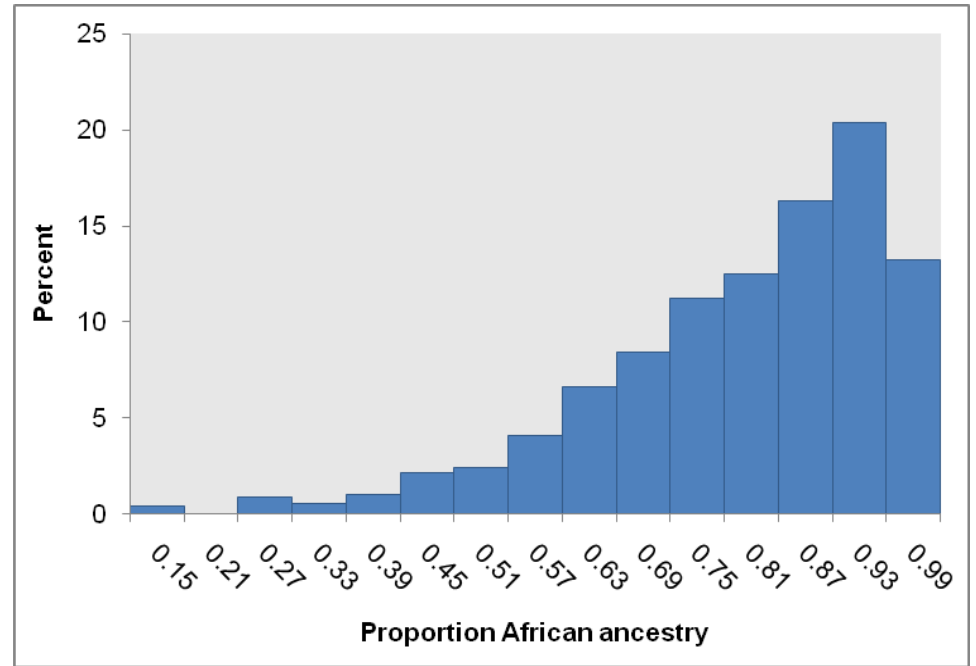

**Supplemental Figure 2. Distributions of European, African, and Native American ancestry among Hispanics**

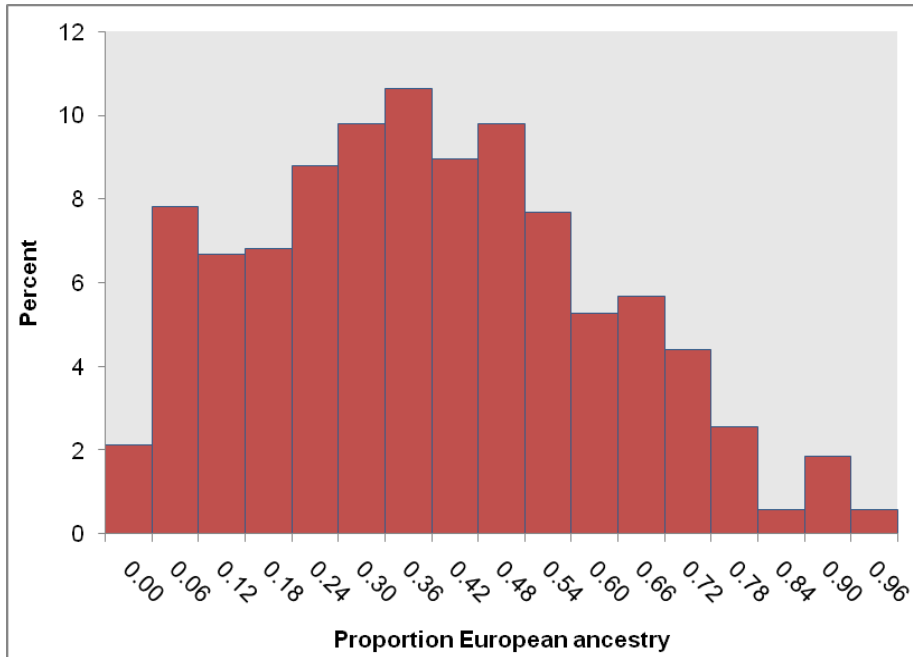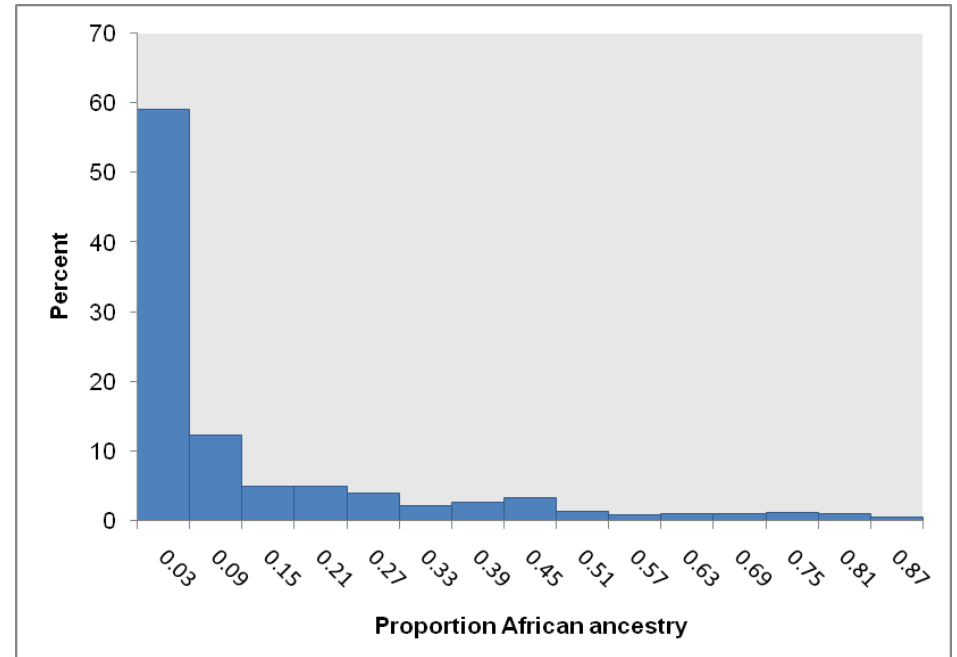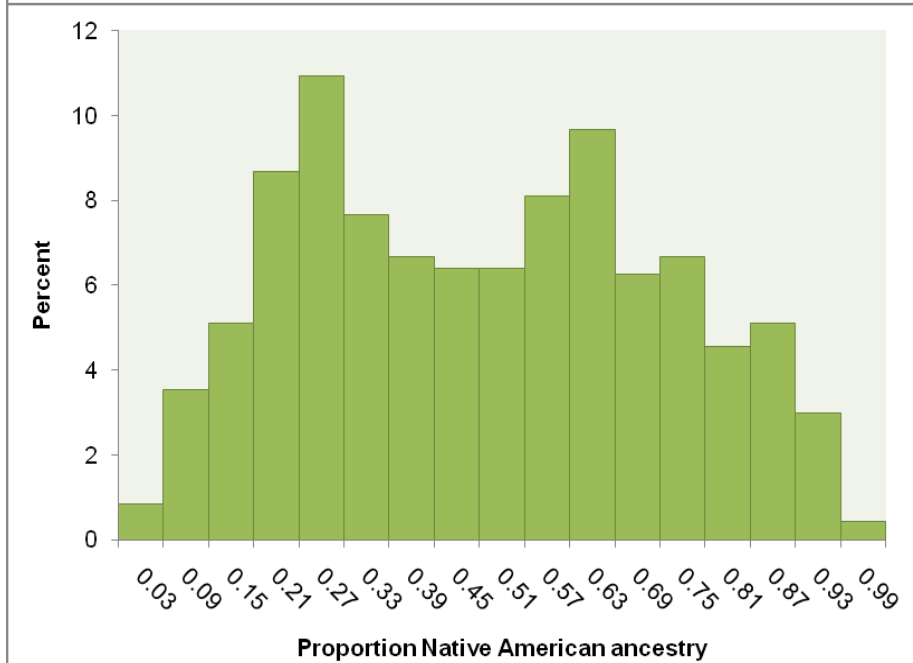

Supplement: NIHMS153769-supplement-Supp1.pdf [file NIHMS153769-supplement-Supp1.pdf]
